# Supplementary material for: Genome-wide identification of 2-oxoglutarate and Fe (II)-dependent dioxygenase family genes and their expression profiling under drought and salt stress in potato
Source: PeerJ. 2023 Nov 20;11:e16449. doi: 10.7717/peerj.16449 (PMC10666615; doi:10.7717/peerj.16449)
Supplement: Supplemental Information 6 [file peerj-11-16449-s006.xlsx]

## Sheet: Salt_St138
Biological replicate	1	1	1	2	2	2	3	3	3	1	1	1	2	2	2	3	3	3	1	1	1	2	2	2	3	3	3	1	1	1	2	2	2	3	3	3	1	1	1	2	2	2	3	3	3
sample name	EF	EF	EF	EF	EF	EF	EF	EF	EF	EF	EF	EF	EF	EF	EF	EF	EF	EF	EF	EF	EF	EF	EF	EF	EF	EF	EF	EF	EF	EF	EF	EF	EF	EF	EF	EF	EF	EF	EF	EF	EF	EF	EF	EF	EF
Stress/Control	C 1	C 1	C 1	C 2	C 2	C 2	C 3	C 3	C 3	72H1	72H1	72H1	72H2	72H2	72H2	72H3	72H3	72H3	48H1	48H1	48H1	48H2	48H2	48H2	48H3	48H3	48H3	24H1	24H1	24H1	24H2	24H2	24H2	24H3	24H3	24H3	96H1	96H1	96H1	96H2	96H2	96H2	96H3	96H3	96H3
Ct value	19.88	25.59	19.91	19.6	22.66	18.24	21.89	24.35	17.17	25.15	23.42	19.3	21.88	26.77	21.23	20.27	25.68	21.05	17.91	24.45	18.58	18.64	23.46	19.75	20.32	26.34	22.18	20.64	24.01	19.88	20.55	25.64	19.94	18.01	25.16	19.43	20.39	28.89	22.39	24.97	25.35	22.89	23.35	28.76	23.22
Ct mean		19.895			18.92			19.53			21.36			21.555			20.66			18.245			19.195			21.25			20.26			20.245			18.72			21.39			24.4033			23.285
FINAL CT Mean					19.4483						21.1917									19.5633									19.7417									23.0261
∆Ct
PRIMERS	St138	St138	St138	St138	St138	St138	St138	St138	St138	St138	St138	St138	St138	St138	St138	St138	St138	St138	St138	St138	St138	St138	St138	St138	St138	St138	St138	St138	St138	St138	St138	St138	St138	St138	St138	St138	St138	St138	St138	St138	St138	St138	St138	St138	St138
Stress/Control	C 1	C 1	C 1	C 2	C 2	C 2	C 3	C 3	C 3	72H1	72H1	72H1	72H2	72H2	72H2	72H3	72H3	72H3	48H1	48H1	48H1	48H2	48H2	48H2	48H3	48H3	48H3	24H1	24H1	24H1	24H2	24H2	24H2	24H3	24H3	24H3	96H1	96H1	96H1	96H2	96H2	96H2	96H3	96H3	96H3
Ct value	21.82	25.93	22.43	22.21	26.29	22.31	22.36	25.52	21.31	22.22	26.43	24.22	21.98	26.65	23.88	22.19	25.87	22.02	21.65	24.13	21.78	21.86	27.66	22.24	21.42	22.23	21.8	21.8	25.85	22.24	22.15	26.22	22.62	21.7	24.64	21.59	24.03	27.01	23.68	23.31	27.01	23.53	22.53	26.44	23.39
MEAN		22.125			22.26			21.835			23.22			22.93			22.105			21.715			22.05			21.8167			22.02			22.385			21.645			25.57			23.42			22.96
FINAL CT Mean					22.0733									22.7517									21.8606									22.0167									23.9833
∆Ct					2.625						1.56												2.29722									2.275									0.957222
∆∆Ct											-1.065												-0.327778									-0.35									-1.66778
FOLD CHANGE											2.09217												1.25508									1.27456									3.17725
FOLD CHANGE MEAN
	C1	C2	C3	241	242	243	481	482	483	721	722	723	961	962	963
∆Ct	2.23	3.34	2.305	1.76	2.14	2.925	3.47	2.855	0.566667	1.86	1.375	1.445	4.18	-0.983333	-0.325
∆∆Ct				-0.47	-1.2	0.62	1.24	-0.485	-1.73833	-0.37	-1.965	-0.86	1.95	-4.32333	-2.63
FOLD CHANGE				1.38511	2.2974	0.650671	0.423373	1.39959	3.33649	1.29235	3.90413	1.81504	3.94493	5.06303	6.19026
													-1.98	-2.34

## Sheet: Salt_St76
Biological replicate	1	1	1	2	2	2	3	3	3	1	1	1	2	2	2	3	3	3	1	1	1	2	2	2	3	3	3	1	1	1	2	2	2	3	3	3	1	1	1	2	2	2	3	3	3
sample name	EF	EF	EF	EF	EF	EF	EF	EF	EF	EF	EF	EF	EF	EF	EF	EF	EF	EF	EF	EF	EF	EF	EF	EF	EF	EF	EF	EF	EF	EF	EF	EF	EF	EF	EF	EF	EF	EF	EF	EF	EF	EF	EF	EF	EF
Stress/Control	C 1	C 1	C 1	C 2	C 2	C 2	C 3	C 3	C 3	72H1	72H1	72H1	72H2	72H2	72H2	72H3	72H3	72H3	48H1	48H1	48H1	48H2	48H2	48H2	48H3	48H3	48H3	24H1	24H1	24H1	24H2	24H2	24H2	24H3	24H3	24H3	96H1	96H1	96H1	96H2	96H2	96H2	96H3	96H3	96H3
Ct value	19.88	25.59	19.91	19.6	22.66	18.24	21.89	24.35	17.17	25.15	23.42	19.3	21.88	26.77	21.23	20.27	25.68	21.05	17.91	24.45	18.58	18.64	23.46	19.75	20.32	26.34	22.18	20.64	24.01	19.88	20.55	25.64	19.94	18.01	25.16	19.43	20.39	28.89	22.39	24.97	25.35	22.89	23.35	28.76	23.22
Ct mean		19.895			18.92			19.53			21.36			21.555			20.66			18.245			19.195			21.25			20.26			20.245			18.72			21.39			24.4033			23.285
FINAL CT Mean					19.4483						21.1917									19.5633									19.7417									23.0261
∆Ct
PRIMERS	St76	St76	St76	St76	St76	St76	St76	St76	St76	St76	St76	St76	St76	St76	St76	St76	St76	St76	St76	St76	St76	St76	St76	St76	St76	St76	St76	St76	St76	St76	St76	St76	St76	St76	St76	St76	St76	St76	St76	St76	St76	St76	St76	St76	St76
Stress/Control	C 1	C 1	C 1	C 2	C 2	C 2	C 3	C 3	C 3	72H1	72H1	72H1	72H2	72H2	72H2	72H3	72H3	72H3	48H1	48H1	48H1	48H2	48H2	48H2	48H3	48H3	48H3	24H1	24H1	24H1	24H2	24H2	24H2	24H3	24H3	24H3	96H1	96H1	96H1	96H2	96H2	96H2	96H3	96H3	96H3
Ct value	26.1	26.36	25.7	26.22	26.41	26.04	25.82	26.85	26.13	26.06	25.77	25.32	26.87	26	25.32	26.44	24.46	25.51	26.34	25.74	25.43	25.7	25.12	25.45	25.76	25.88	25.54	26.39	26.29	25.65	26	26.07	25.61	25.6	26.87	26.1	26.48	26.45	25.95	23.31	27.64	23.52	26.37	27.06	24.49
MEAN		26.0533			26.2233			26.2667			25.7167			26.0633			24.985			25.585			25.4233			25.7267			26.11			25.8933			26.19			26.2933			24.05			26.715
FINAL CT Mean					26.1811									25.5883									25.5783									26.0644									25.6861
∆Ct					6.73278						4.39667												6.015									6.32278									2.66
∆∆Ct											-2.33611												-0.717778									-0.41									-4.07278
FOLD CHANGE											5.0494												1.64465									1.32869									16.8278
FOLD CHANGE MEAN
	C1	C2	C3	241	242	243	481	482	483	721	722	723	961	962	963
∆Ct	6.15833	7.30333	6.73667	5.85	5.64833	7.47	7.34	6.22833	4.47667	4.35667	4.50833	4.325	4.90333	-1.3	3.43
∆∆Ct				-0.308333	-1.655	0.733333	1.18167	-1.075	-2.26	-1.80167	-2.795	-2.41167	-1.255	-8.60333	-3.30667
FOLD CHANGE				1.23828	3.14923	0.601513	0.440842	2.10672	4.78991	3.48623	6.94031	5.32089	2.38667	3.80123	9.89477
														3.801

## Sheet: Salt_St91
Biological replicate	1	1	1	2	2	2	3	3	3	1	1	1	2	2	2	3	3	3	1	1	1	2	2	2	3	3	3	1	1	1	2	2	2	3	3	3	1	1	1	2	2	2	3	3	3
sample name	EF	EF	EF	EF	EF	EF	EF	EF	EF	EF	EF	EF	EF	EF	EF	EF	EF	EF	EF	EF	EF	EF	EF	EF	EF	EF	EF	EF	EF	EF	EF	EF	EF	EF	EF	EF	EF	EF	EF	EF	EF	EF	EF	EF	EF
Stress/Control	C 1	C 1	C 1	C 2	C 2	C 2	C 3	C 3	C 3	24H1	24H1	24H1	24H2	24H2	24H2	24H3	24H3	24H3	48H1	48H1	48H1	48H2	48H2	48H2	48H3	48H3	48H3	72H1	72H1	72H1	72H2	72H2	72H2	72H3	72H3	72H3	96H1	96H1	96H1	96H2	96H2	96H2	96H3	96H3	96H3
Ct value	19.88	25.59	19.91	19.6	22.66	18.24	21.89	24.35	17.17	25.15	23.42	19.3	21.88	26.77	21.23	20.27	25.68	21.05	17.91	24.45	18.58	18.64	23.46	19.75	20.32	26.34	22.18	20.64	24.01	19.88	20.55	25.64	19.94	18.01	25.16	19.43	20.39	28.89	22.39	24.97	25.35	22.89	23.35	28.76	23.22
Ct mean		19.895			18.92			19.53			21.36			21.555			20.66			18.245			19.195			21.25			20.26			20.245			18.72			21.39			24.4033			23.285
FINAL CT Mean					19.4483						21.1917									19.5633									19.7417									23.0261
∆Ct
PRIMERS	St91	St91	St91	St91	St91	St91	St91	St91	St91	St91	St91	St91	St91	St91	St91	St91	St91	St91	St91	St91	St91	St91	St91	St91	St91	St91	St91	St91	St91	St91	St91	St91	St91	St91	St91	St91	St91	St91	St91	St91	St91	St91	St91	St91	St91
Stress/Control	C 1	C 1	C 1	C 2	C 2	C 2	C 3	C 3	C 3	24H1	24H1	24H1	24H2	24H2	24H2	24H3	24H3	24H3	48H1	48H1	48H1	48H2	48H2	48H2	48H3	48H3	48H3	72H1	72H1	72H1	72H2	72H2	72H2	72H3	72H3	72H3	96H1	96H1	96H1	96H2	96H2	96H2	96H3	96H3	96H3
Ct value	31.96	32.25	32.55	31.52	34.09	33.29	32.17	31.19	33.11	32.6	32.15	31.63	32.37	32.88	32.08	32.2	32.8	31.89	35.48	32.25	32	27.93	31.82	32.09	30.86	32.06	31.07	32.1	33.07	31.05	31.12	31.69	31.05	32.33	31.37	32.51	32.23	34.57	32.46	31.01	34.34	32.89	31.36	31.77	32.14
MEAN		32.2533			32.9667			32.1567			32.1267			32.4433			32.2967			33.2433			31.955			31.33			32.0733			31.2867			32.42			33.0867			32.7467			31.7567
FINAL CT Mean					32.4589									32.2889									32.1761									31.9267									32.53
∆Ct					13.0106						11.0972												12.6128									12.185									9.50389
∆∆Ct											-1.91333												-0.397778									-0.825556									-3.50667
FOLD CHANGE											3.76678												1.31748									1.77222									11.3661
FOLD CHANGE MEAN
	C1	C2	C3	241	242	243	481	482	483	721	722	723	961	962	963
∆Ct	12.3583	14.0467	12.6267	10.7667	10.8883	11.6367	14.9983	8.495	4.99	11.8133	11.0417	13.7	11.6967	8.34333	8.47167
∆∆Ct				-1.59167	-3.15833	-0.99	2.64	-5.55167	-7.63667	-0.545	-3.005	1.07333	-0.661667	-5.70333	-4.155
FOLD CHANGE				3.01397	8.92798	1.98618	0.160428	46.9049	199.006	1.45902	8.02777	0.47522	1.58191	4.59479	17.8147
														-2.2

## Sheet: Salt_St34
Biological replicate	1	1	1	2	2	2	3	3	3	1	1	1	2	2	2	3	3	3	1	1	1	2	2	2	3	3	3	1	1	1	2	2	2	3	3	3	1	1	1	2	2	2	3	3	3
sample name	EF	EF	EF	EF	EF	EF	EF	EF	EF	EF	EF	EF	EF	EF	EF	EF	EF	EF	EF	EF	EF	EF	EF	EF	EF	EF	EF	EF	EF	EF	EF	EF	EF	EF	EF	EF	EF	EF	EF	EF	EF	EF	EF	EF	EF
Stress/Control	C 1	C 1	C 1	C 2	C 2	C 2	C 3	C 3	C 3	24H1	24H1	24H1	24H2	24H2	24H2	24H3	24H3	24H3	48H1	48H1	48H1	48H2	48H2	48H2	48H3	48H3	48H3	72H1	72H1	72H1	72H2	72H2	72H2	72H3	72H3	72H3	96H1	96H1	96H1	96H2	96H2	96H2	96H3	96H3	96H3
Ct value	19.88	25.59	19.91	19.6	22.66	18.24	21.89	24.35	17.17	25.15	23.42	19.3	21.88	26.77	21.23	20.27	25.68	21.05	17.91	24.45	18.58	18.64	23.46	19.75	20.32	26.34	22.18	20.64	24.01	19.88	20.55	25.64	19.94	18.01	25.16	19.43	20.39	28.89	22.39	24.97	25.35	22.89	23.35	28.76	23.22
Ct mean		19.895			18.92			19.53			21.36			21.555			20.66			18.245			19.195			21.25			20.26			20.245			18.72			21.39			24.4033			23.285
FINAL CT Mean					19.4483						21.1917									19.5633									19.7417									23.0261
∆Ct
PRIMERS	St34	St34	St34	St34	St34	St34	St34	St34	St34	St34	St34	St34	St34	St34	St34	St34	St34	St34	St34	St34	St34	St34	St34	St34	St34	St34	St34	St34	St34	St34	St34	St34	St34	St34	St34	St34	St34	St34	St34	St34	St34	St34	St34	St34	St34
Stress/Control	C 1	C 1	C 1	C 2	C 2	C 2	C 3	C 3	C 3	24H1	24H1	24H1	24H2	24H2	24H2	24H3	24H3	24H3	48H1	48H1	48H1	48H2	48H2	48H2	48H3	48H3	48H3	72H1	72H1	72H1	72H2	72H2	72H2	72H3	72H3	72H3	96H1	96H1	96H1	96H2	96H2	96H2	96H3	96H3	96H3
Ct value	23.52	24.8	23.91	22.69	23.98	24.27	24.74	25.31	23.96	25.03	24.89	24.66	23.18	24.99	25.13	23.49	24.98	25.22	22.83	25.74	25.42	22.08	23.01	22.89	21.42	22.23	21.8	22.43	23.89	24.01	24.73	25.11	23.99	25.89	24.64	22.08	23.8	25.99	26.29	27.89	26.39	27.1	26.09	27.24	25.89
MEAN		24.0767			23.6467			24.67			24.86			24.4333			24.5633			24.6633			22.66			21.8167			23.4433			24.61			24.2033			25.36			27.1267			26.4067
FINAL CT Mean					24.1311									24.6189									23.0467									24.0856									26.2978
∆Ct					4.68278						3.42722												3.48333									4.34389									3.27167
∆∆Ct											-1.25556												-1.19944									-0.338889									-1.41111
FOLD CHANGE											2.38759												2.29651									1.26478									2.65942
FOLD CHANGE MEAN
		C1	C2	C3	241	242	243	481	482	483	721	722	723	961	962	963
	∆Ct	4.18167	4.72667	5.14	3.5	2.87833	3.90333	6.41833	3.465	0.566667	3.18333	4.365	5.48333	3.97	2.72333	3.12167
	∆∆Ct				-0.681667	-1.84833	-1.23667	2.23667	-1.26167	-4.57333	-0.998333	-0.361667	0.343333	-0.211667	-2.00333	-2.01833
	FOLD CHANGE				1.60399	3.60084	2.35653	0.212176	2.39773	23.8073	1.99769	1.28491	0.788218	1.15803	4.00925	4.05116

## Sheet: DRT_54
Biological replicate	1	1	1	2	2	2	3	3	3	1	1	1	2	2	2	3	3	3	1	1	1	2	2	2	3	3	3
sample name	EF	EF	EF	EF	EF	EF	EF	EF	EF	EF	EF	EF	EF	EF	EF	EF	EF	EF	EF	EF	EF	EF	EF	EF	EF	EF	EF
Stress/Control	C 1	C 1	C 1	C 2	C 2	C 2	C 3	C 3	C 3	DRT1B	DRT1B	DRT1B	DRT2A	DRT2A	DRT2A	DRT3A	DRT3A	DRT3A	RWT1A	RWT1A	RWT1A	RWT2A	RWT2A	RWT2A	RWT3B	RWT3B	RWT3B
Ct value	22.05			22.45			22.47			26.73	26.8	27.14				28.71	28.95	28.87	29.85	30.65	30.07				30.64	30.3	30.16
Ct mean		22.05			22.45			22.47			26.89			25.82			28.8433			26.18			25.23			27.64
FINAL CT Mean					22.3233						27.8667									26.91
∆Ct
PRIMERS	54	54	54	54	54	54	54	54	54	54	54	54	54	54	54	54	54	54	54	54	54	54	54	54	54	54	54
Stress/Control	DC2A	DC2A	DC2A	C 2	C 2	C 2	C 3	C 3	C 3	DRT1B	DRT1B	DRT1B	DRT2A	DRT2A	DRT2A	DRT3A	DRT3A	DRT3A	RWT1A	RWT1A	RWT1A	RWT2A	RWT2A	RWT2A	RWT3B	RWT3B	RWT3B
Ct value	29.15			26.68			29.43			29.38	29.43	29.66	29.29	29.64	29.4	29.81	29.26	29.4	29.51	30	29.84	29.57	29.46	29.38	29.07	29	28.8
MEAN		25.45			26.68			24.05			29.49			29.4433			29.49			29.7833			29.47			28.9567
FINAL CT Mean					25.3933									29.4744									29.4033
∆Ct					3.07						1.60778												2.49333
∆∆Ct											-1.46222												-0.576667
FOLD CHANGE											2.75532												1.4914
FOLD CHANGE MEAN
	C1	C2	C3	DRT1	DRT2	DRT3	RWT1	RWT2	RWT3
∆Ct	3.4	4.23	1.58	2.6	3.65	0.65	3.60333	4.24	1.31667
∆∆Ct				-0.8	-0.58	-0.93	0.203333	0.01	-0.263333
FOLD CHANGE				1.7411	1.49485	1.90528	0.868541	0.993092	1.20025

## Sheet: DRT_25
Biological replicate	1	1	1	2	2	2	3	3	3	1	1	1	2	2	2	3	3	3	1	1	1	2	2	2	3	3	3
sample name	EF	EF	EF	EF	EF	EF	EF	EF	EF	EF	EF	EF	EF	EF	EF	EF	EF	EF	EF	EF	EF	EF	EF	EF	EF	EF	EF
Stress/Control	C 1	C 1	C 1	C 2	C 2	C 2	C 3	C 3	C 3	DRT1B	DRT1B	DRT1B	DRT2A	DRT2A	DRT2A	DRT3A	DRT3A	DRT3A	RWT1A	RWT1A	RWT1A	RWT2A	RWT2A	RWT2A	RWT3B	RWT3B	RWT3B
Ct value	22.05			22.45			22.47			26.73	26.8	27.14				28.71	28.95	28.87	29.85	30.65	30.07				30.64	30.3	30.16
Ct mean		22.05			22.45			22.47			26.89			25.82			28.8433			26.18			25.23			27.64
FINAL CT Mean					22.3233						27.8667									26.91
∆Ct
PRIMERS	25	25	25	25	25	25	25	25	25	25	25	25	25	25	25	25	25	25	25	25	25	25	25	25	25	25	25
Stress/Control	DC2A	DC2A	DC2A	C 2	C 2	C 2	C 3	C 3	C 3	DRT1B	DRT1B	DRT1B	DRT2A	DRT2A	DRT2A	DRT3A	DRT3A	DRT3A	RWT1A	RWT1A	RWT1A	RWT2A	RWT2A	RWT2A	RWT3B	RWT3B	RWT3B
Ct value	35.57			35.92			39.35			34.36	33.55	34.84	34.57	0	35.44	36.09	41.62	36.92	0	0	0	45.04	39.64	39.32	36.96	36.16	35.47
MEAN		25.56			27.06			25.1			29.23			28.93			30.178			29.89			29.86			30.02
FINAL CT Mean					26.31									29.446									29.94
∆Ct					3.98667						1.57933												3.03
∆∆Ct											-2.40733												-0.956667
FOLD CHANGE											5.30493												1.94082
FOLD CHANGE MEAN
	C1	C2	C3	DRT1	DRT2	DRT3	RWT1	RWT2	RWT3
∆Ct	3.51	4.61	2.63	2.34	3.11	1.33467	3.71	4.63	2.38
∆∆Ct				-1.17	-1.5	-1.29533	0.2	0.02	-0.25
FOLD CHANGE				2.25012	2.82843	2.45434	0.870551	0.986233	1.18921

## Sheet: DRT_130
Biological replicate	1	1	1	2	2	2	3	3	3	1	1	1	2	2	2	3	3	3	1	1	1	2	2	2	3	3	3
sample name	EF	EF	EF	EF	EF	EF	EF	EF	EF	EF	EF	EF	EF	EF	EF	EF	EF	EF	EF	EF	EF	EF	EF	EF	EF	EF	EF
Stress/Control	C 1	C 1	C 1	C 2	C 2	C 2	C 3	C 3	C 3	DRT1B	DRT1B	DRT1B	DRT2A	DRT2A	DRT2A	DRT3A	DRT3A	DRT3A	RWT1A	RWT1A	RWT1A	RWT2A	RWT2A	RWT2A	RWT3B	RWT3B	RWT3B
Ct value	22.05			22.45			22.47			26.73	26.8	27.14				28.71	28.95	28.87	29.85	30.65	30.07				30.64	30.3	30.16
Ct mean		22.05			22.45			22.47			26.89			25.82			28.8433			26.18			25.23			27.64
FINAL CT Mean					22.3233						27.8667									26.91
∆Ct
PRIMERS	130	130	130	130	130	130	130	130	130	130	130	130	130	130	130	130	130	130	130	130	130	130	130	130	130	130	130
Stress/Control	DC2A	DC2A	DC2A	C 2	C 2	C 2	C 3	C 3	C 3	DRT1B	DRT1B	DRT1B	DRT2A	DRT2A	DRT2A	DRT3A	DRT3A	DRT3A	RWT1A	RWT1A	RWT1A	RWT2A	RWT2A	RWT2A	RWT3B	RWT3B	RWT3B
Ct value	32.96			33.78			32.96			32.09	32.79	30.14	30.81	30.36	35.21	32.95	33.87	34.07	29.52	29.04	29.38	30.89	30.94	30.74	32.35	31.19	30.74
MEAN		26.87			27.01			25.79			30.73			29.02			30.98			30.79			29.8			30.66
FINAL CT Mean					26.5567									30.2433									30.4167
∆Ct					4.23333						2.37667												3.50667
∆∆Ct											-1.85667												-0.726667
FOLD CHANGE											3.6217												1.65481
FOLD CHANGE MEAN
	C1	C2	C3	DRT1	DRT2	DRT3	RWT1	RWT2	RWT3
∆Ct	4.82	4.56	3.32	3.84	3.2	2.13667	4.61	4.57	3.02
∆∆Ct				-0.98	-1.36	-1.18333	-0.21	0.01	-0.3
FOLD CHANGE				1.97247	2.56685	2.27101	1.15669	0.993092	1.23114

## Sheet: DRT_22
Biological replicate	1	1	1	2	2	2	3	3	3	1	1	1	2	2	2	3	3	3	1	1	1	2	2	2	3	3	3
sample name	EF	EF	EF	EF	EF	EF	EF	EF	EF	EF	EF	EF	EF	EF	EF	EF	EF	EF	EF	EF	EF	EF	EF	EF	EF	EF	EF
Stress/Control	C 1	C 1	C 1	C 2	C 2	C 2	C 3	C 3	C 3	DRT1B	DRT1B	DRT1B	DRT2A	DRT2A	DRT2A	DRT3A	DRT3A	DRT3A	RWT1A	RWT1A	RWT1A	RWT2A	RWT2A	RWT2A	RWT3B	RWT3B	RWT3B
Ct value	22.05			22.45			22.47			26.73	26.8	27.14				28.71	28.95	28.87	29.85	30.65	30.07				30.64	30.3	30.16
Ct mean		22.05			22.45			22.47			26.89			25.82			28.8433			26.18			25.23			27.64
FINAL CT Mean					22.3233						27.8667									26.91
∆Ct
PRIMERS	22	22	22	22	22	22	22	22	22	22	22	22	22	22	22	22	22	22	22	22	22	22	22	22	22	22	22
Stress/Control	DC2A	DC2A	DC2A	C 2	C 2	C 2	C 3	C 3	C 3	DRT1B	DRT1B	DRT1B	DRT2A	DRT2A	DRT2A	DRT3A	DRT3A	DRT3A	RWT1A	RWT1A	RWT1A	RWT2A	RWT2A	RWT2A	RWT3B	RWT3B	RWT3B
Ct value	28.67			26.38			29.12			28.95	28.64	28.47	28.79	28.6	28.45	28.94	28.81	28.82	28.79	29.03	28.61	29.03	28.85	28.58	28.6	28.74	28.59
MEAN		24.02			25.51			24.12			29.57			29.98			31.72			27.8			27.71			28.83
FINAL CT Mean					24.55									30.4233									28.1133
∆Ct					2.22667						2.55667												1.20333
∆∆Ct											0.33												-1.02333
FOLD CHANGE											0.795536												2.03261
FOLD CHANGE MEAN
	C1	C2	C3	DRT1	DRT2	DRT3	RWT1	RWT2	RWT3
∆Ct	1.97	3.06	1.65	2.68	4.16	2.87667	1.62	2.48	1.19
∆∆Ct				0.71	1.1	1.22667	-0.35	-0.58	-0.46
FOLD CHANGE				0.61132	0.466516	0.427304	1.27456	1.49485	1.37554

## Sheet: DRT_112
Biological replicate	1	1	1	2	2	2	3	3	3	1	1	1	2	2	2	3	3	3	1	1	1	2	2	2	3	3	3
sample name	EF	EF	EF	EF	EF	EF	EF	EF	EF	EF	EF	EF	EF	EF	EF	EF	EF	EF	EF	EF	EF	EF	EF	EF	EF	EF	EF
Stress/Control	C 1	C 1	C 1	C 2	C 2	C 2	C 3	C 3	C 3	DRT1B	DRT1B	DRT1B	DRT2A	DRT2A	DRT2A	DRT3A	DRT3A	DRT3A	RWT1A	RWT1A	RWT1A	RWT2A	RWT2A	RWT2A	RWT3B	RWT3B	RWT3B
Ct value	22.05			22.45			22.47			26.73	26.8	27.14				28.71	28.95	28.87	29.85	30.65	30.07				30.64	30.3	30.16
Ct mean		22.05			22.45			22.47			26.89			25.82			28.8433			26.18			25.23			27.64
FINAL CT Mean					22.3233						27.8667									26.91
∆Ct
PRIMERS	112	112	112	112	112	112	112	112	112	112	112	112	112	112	112	112	112	112	112	112	112	112	112	112	112	112	112
Stress/Control	DC2A	DC2A	DC2A	C 2	C 2	C 2	C 3	C 3	C 3	DRT1B	DRT1B	DRT1B	DRT2A	DRT2A	DRT2A	DRT3A	DRT3A	DRT3A	RWT1A	RWT1A	RWT1A	RWT2A	RWT2A	RWT2A	RWT3B	RWT3B	RWT3B
Ct value	29.15			26.68			29.43			29.38	29.43	29.66	29.29	29.64	29.4	29.81	29.26	29.4	29.51	30	29.84	29.57	29.46	29.38	29.07	29	28.8
MEAN		24.81			25.63			25.72			30.64			30.16			33.6			29.16			29.22			31.54
FINAL CT Mean					25.3867									31.4667									29.9733
∆Ct					3.06333						3.6												3.06333
∆∆Ct											0.536667												-3.55271e-15
FOLD CHANGE											0.689362												1
FOLD CHANGE MEAN
	C1	C2	C3	DRT1	DRT2	DRT3	RWT1	RWT2	RWT3
∆Ct	2.76	3.18	3.25	3.75	4.34	4.75667	2.98	3.99	3.9
∆∆Ct				0.99	1.16	1.50667	0.22	0.81	0.65
FOLD CHANGE				0.503478	0.447513	0.351923	0.858565	0.570382	0.63728
